# Supplementary material
Source: PubMed Central journal article supplement (PMC4125473)

## A TCGA-06-0214

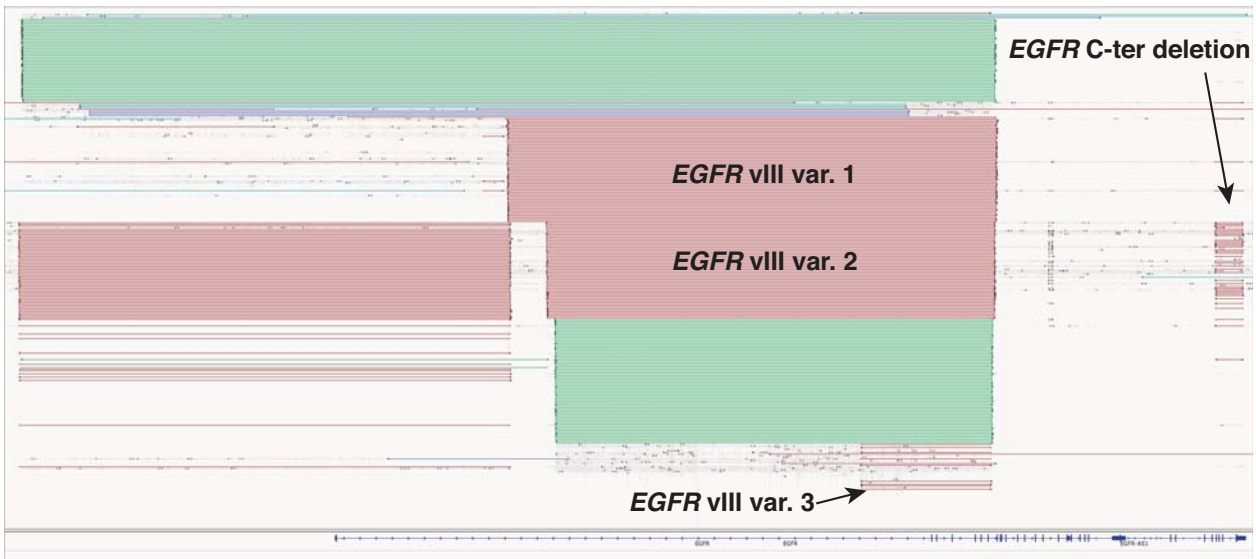

## B TCGA-06-5415

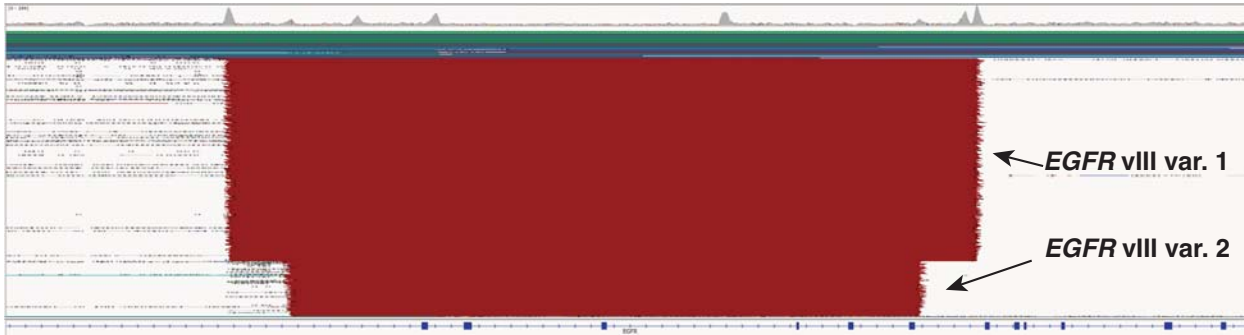

## C TCGA-14-2554

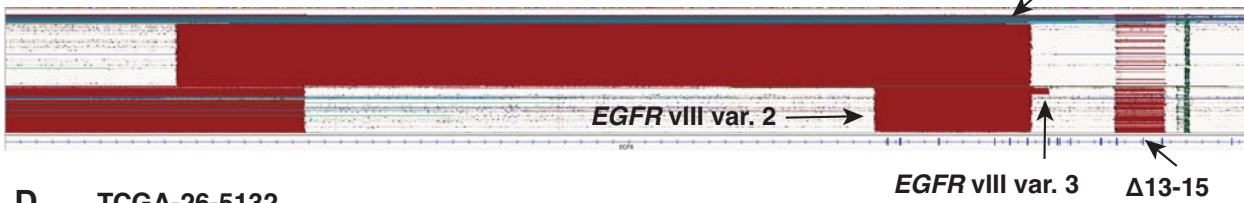

## D TCGA-26-5132

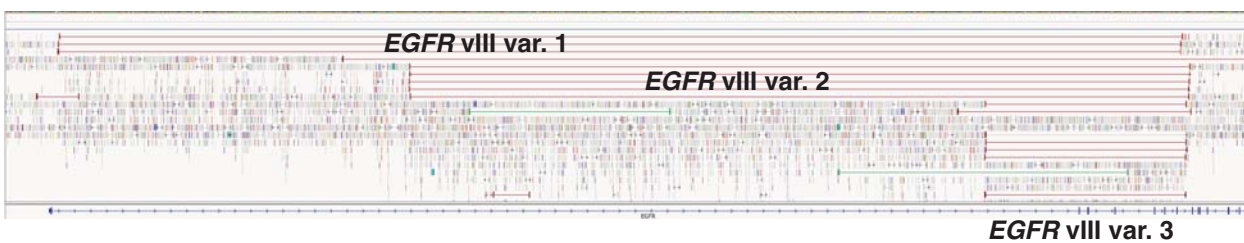

**A** BT340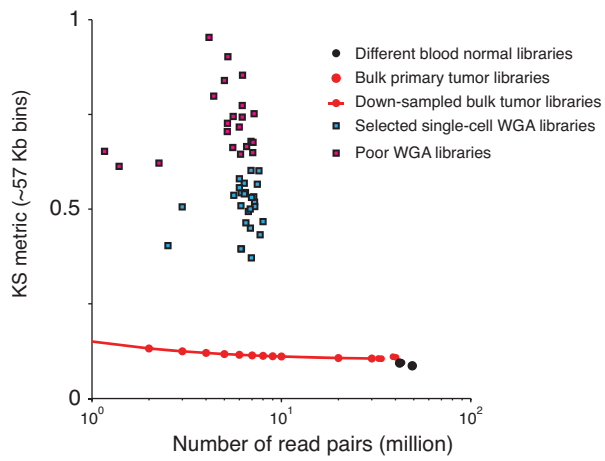**B**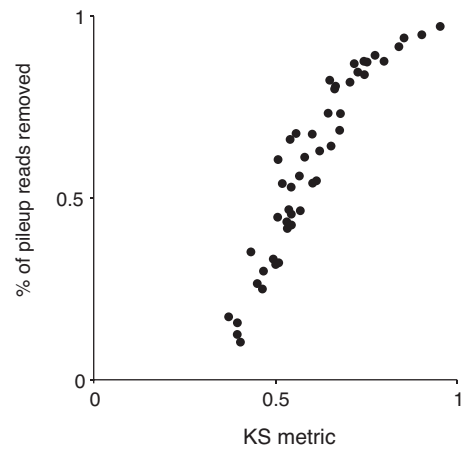**C** BT325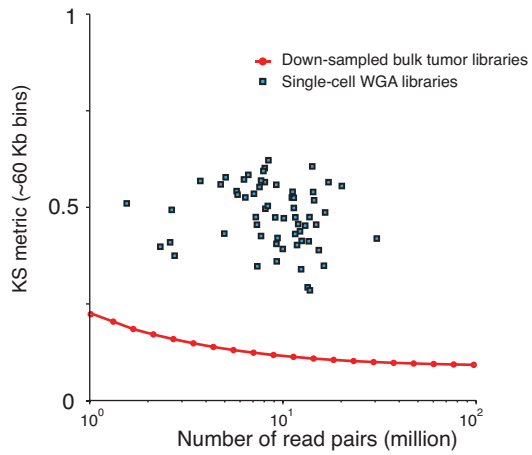

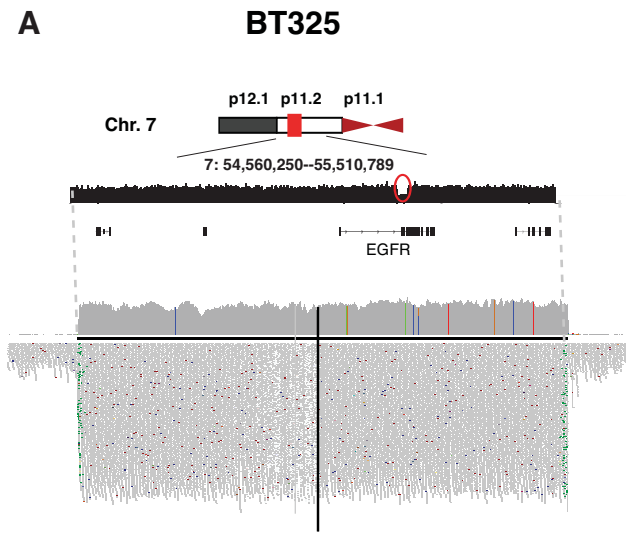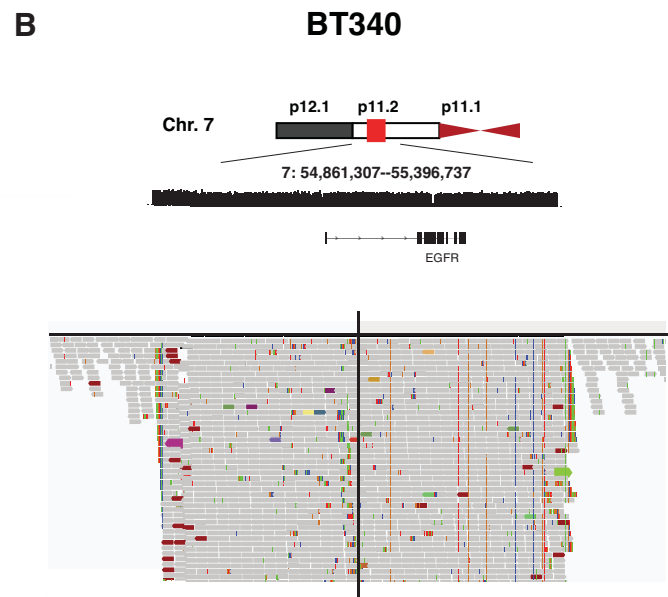

**C** **Two distinct deletions spanning ex. 14-15**

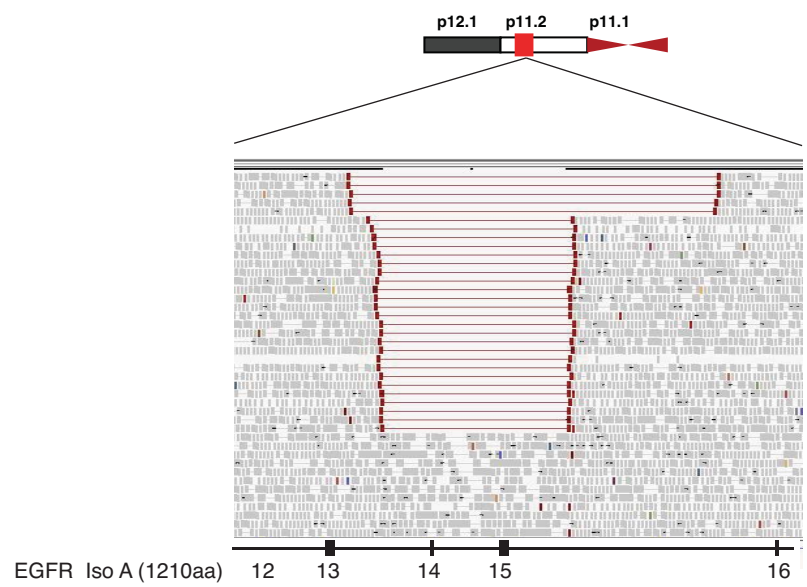

**D**

**EGFR**  
**CEP7**

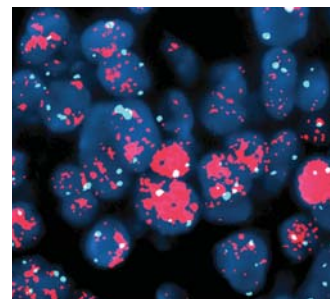

**A** Bulk copy number of BT325

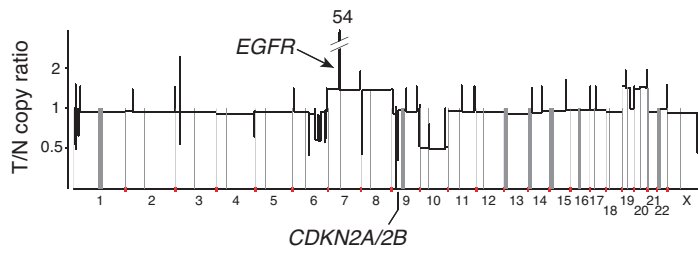

**B** Clonality analysis of SCNA in BT325

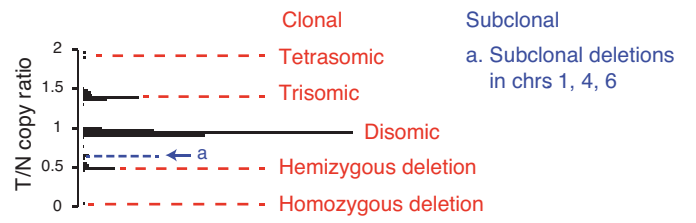

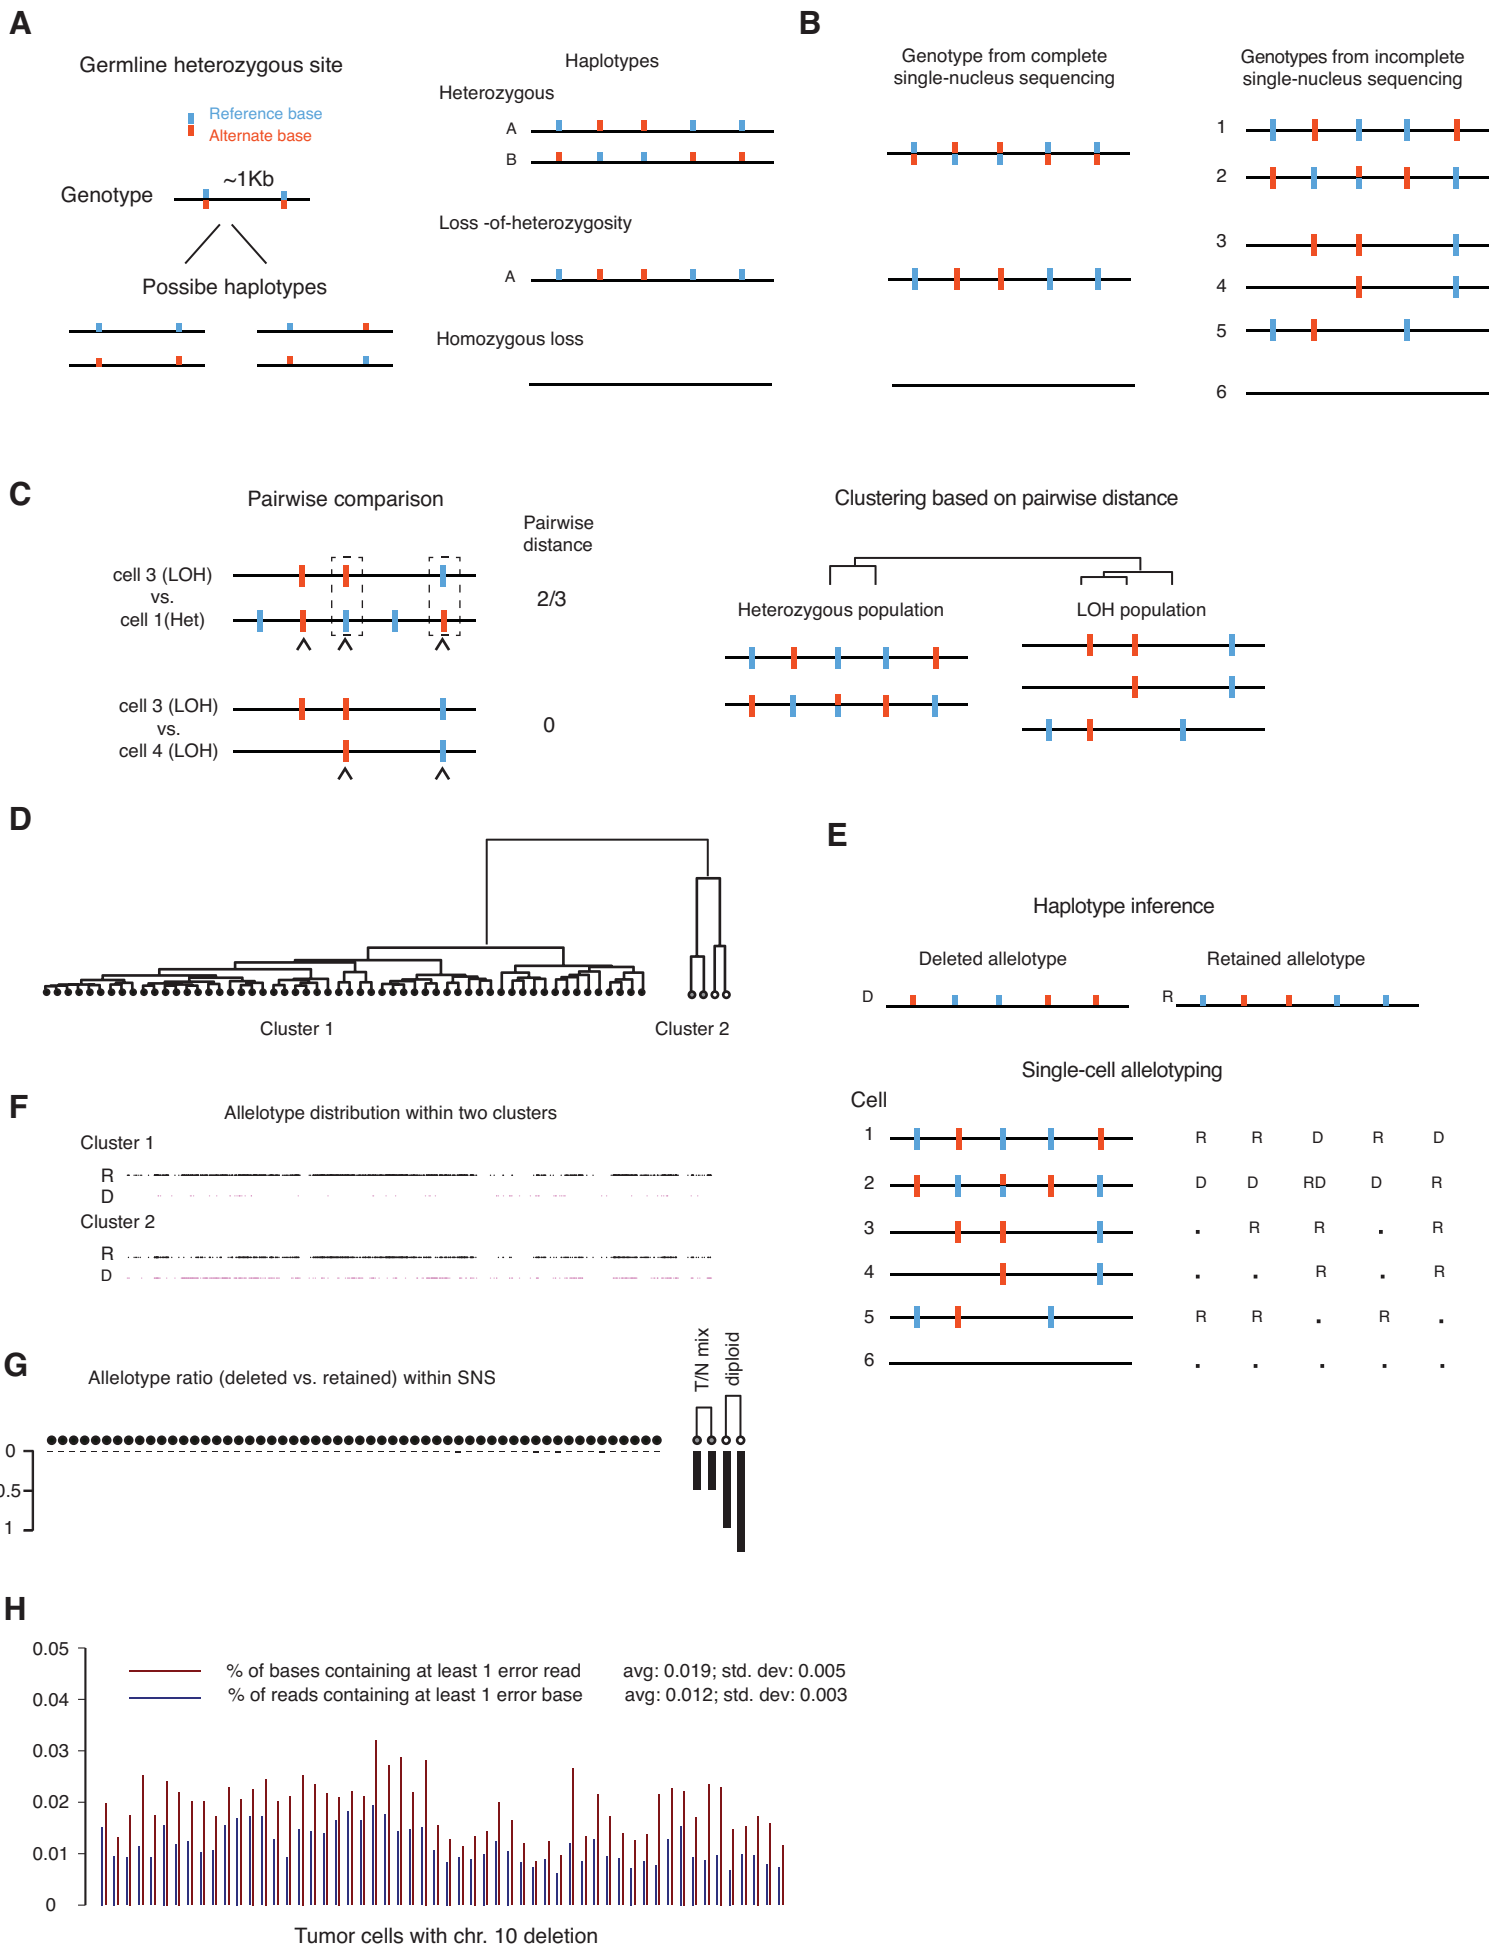



## Clonal Events

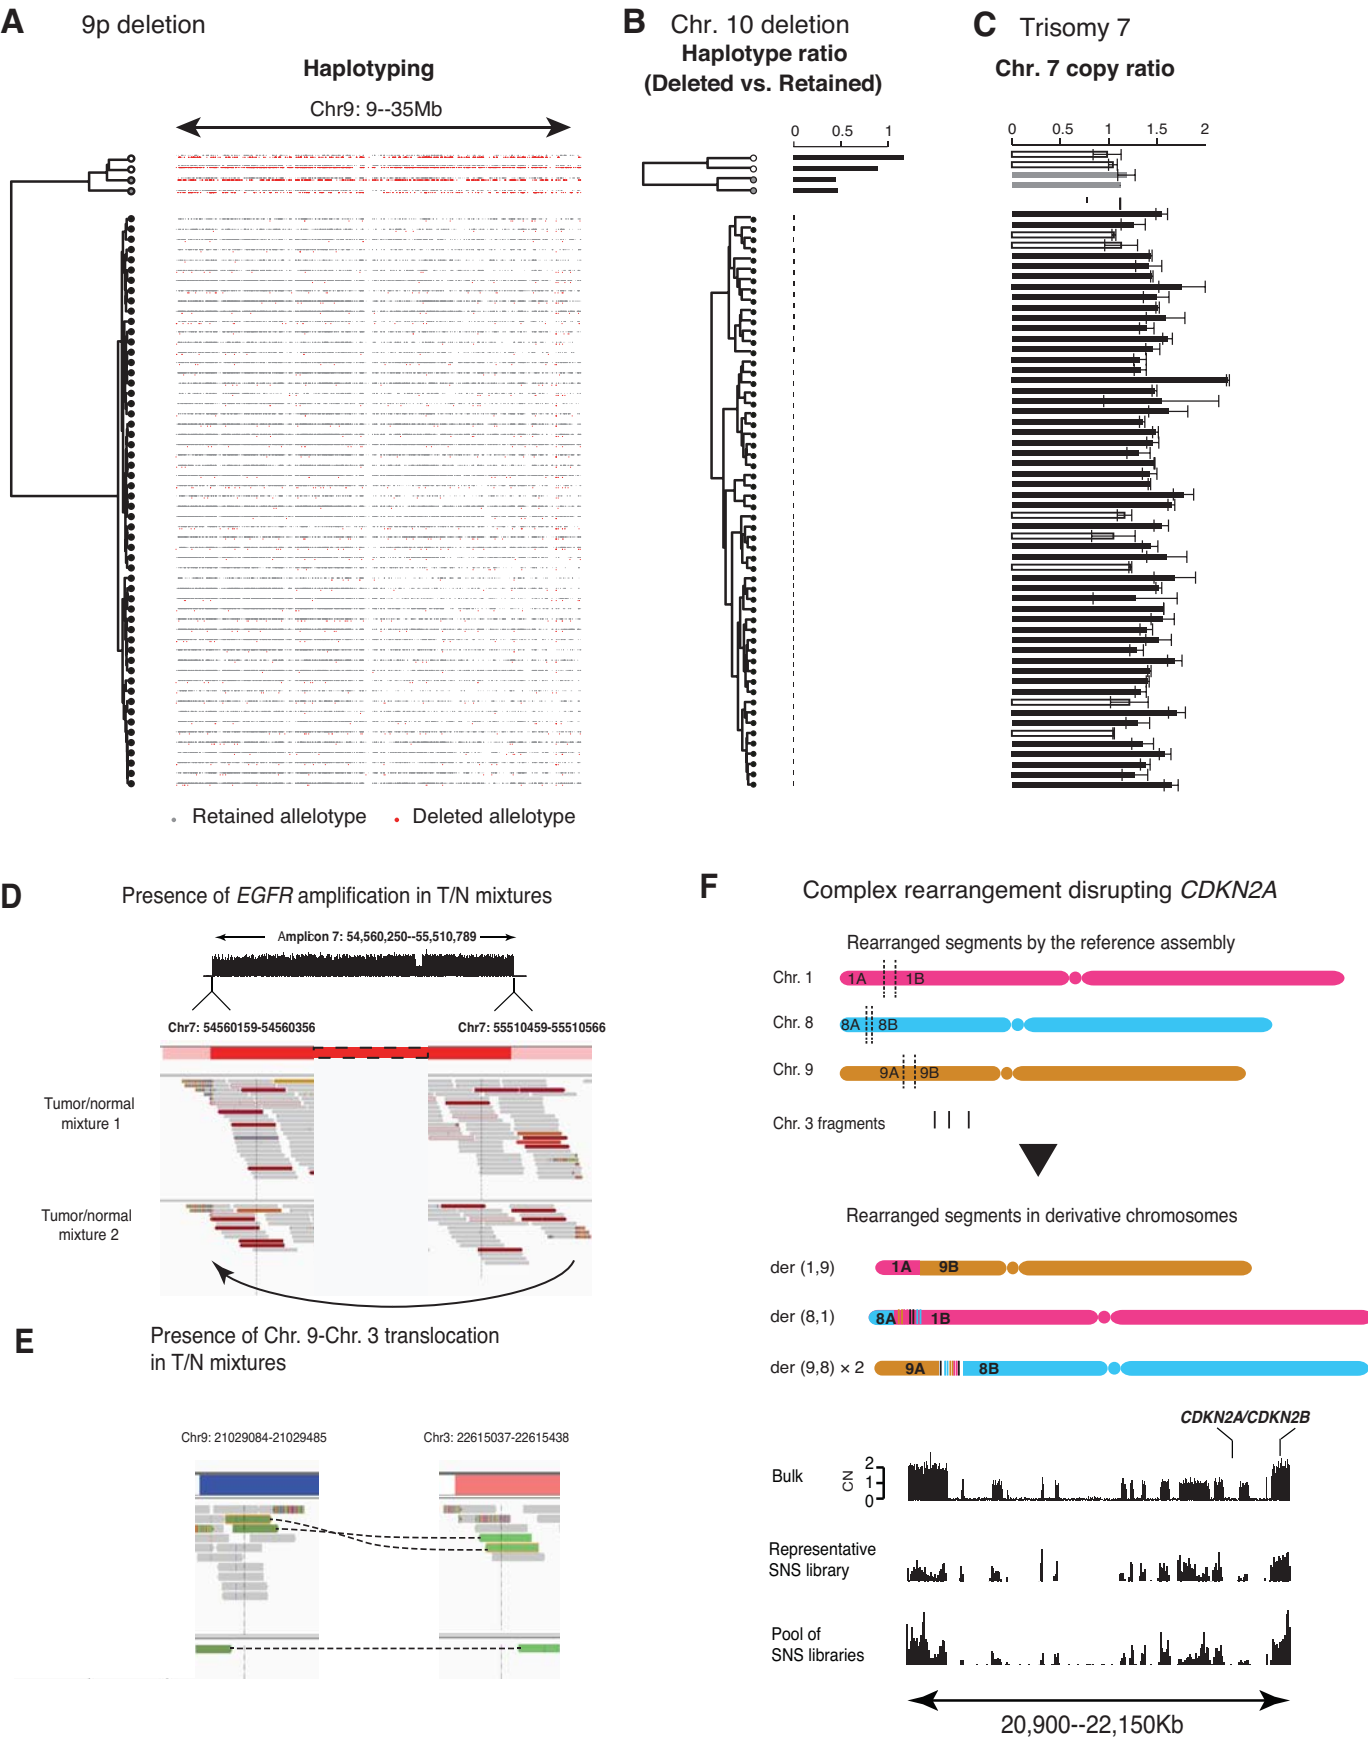

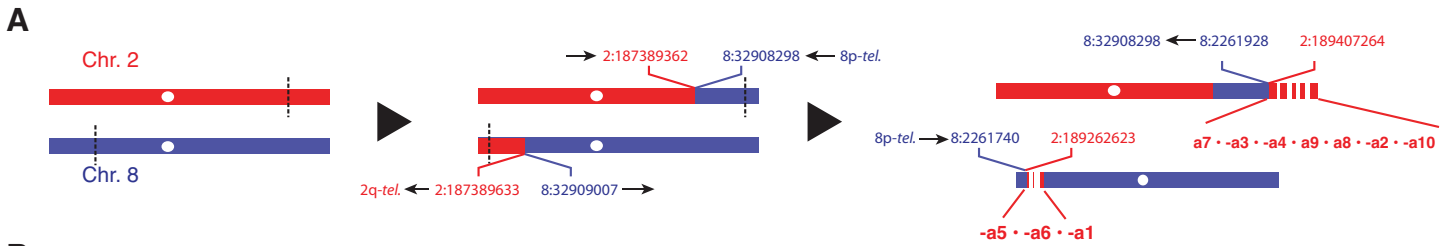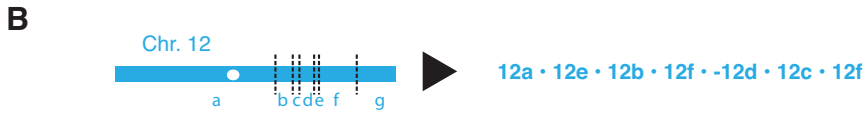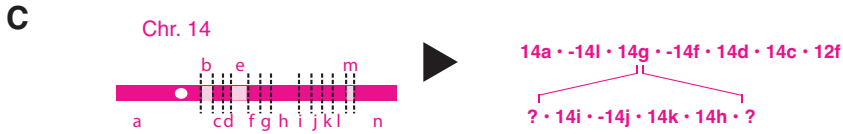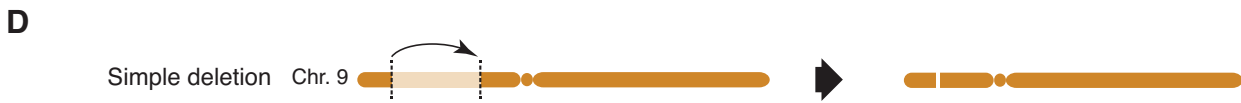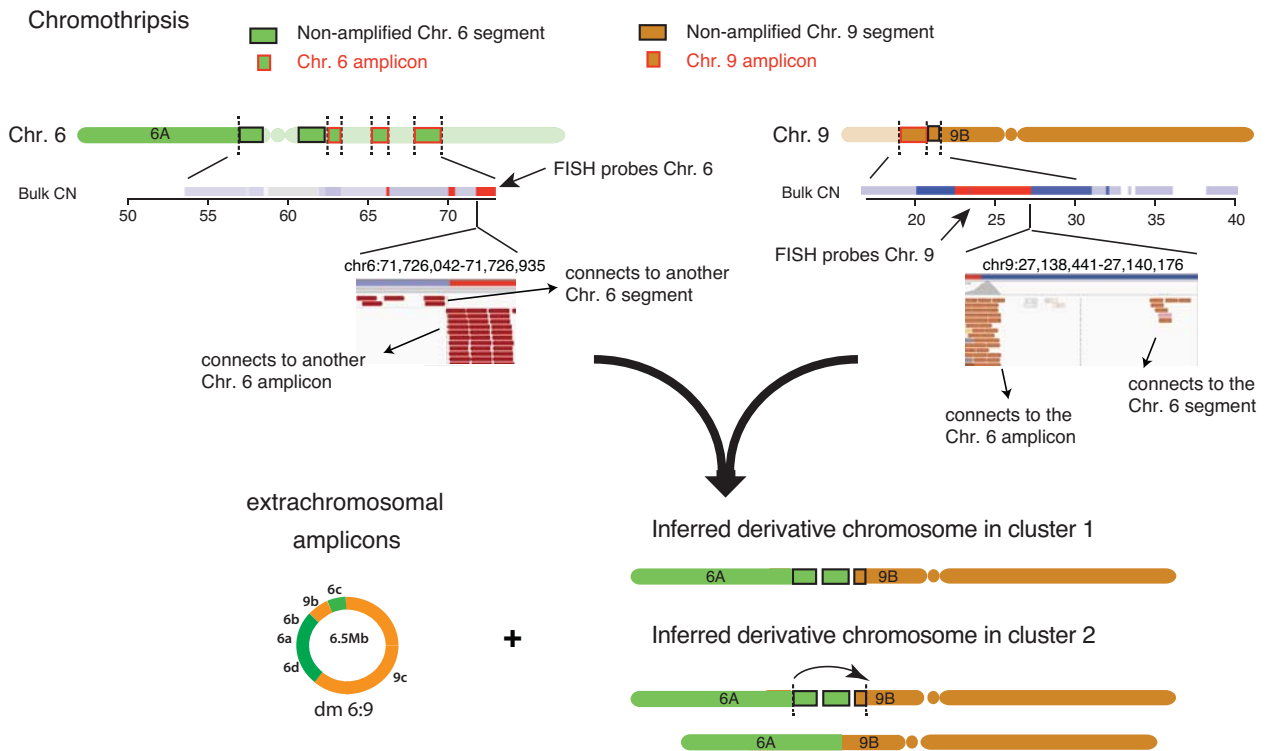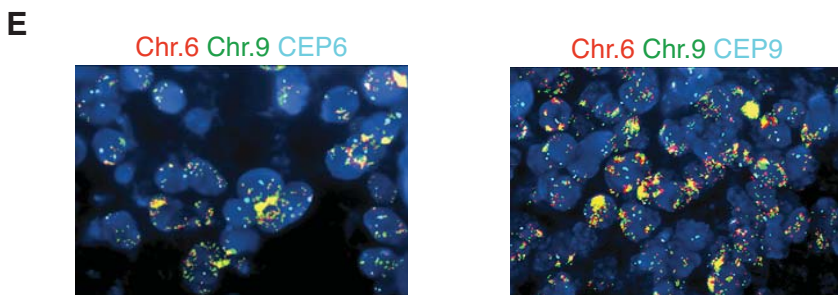



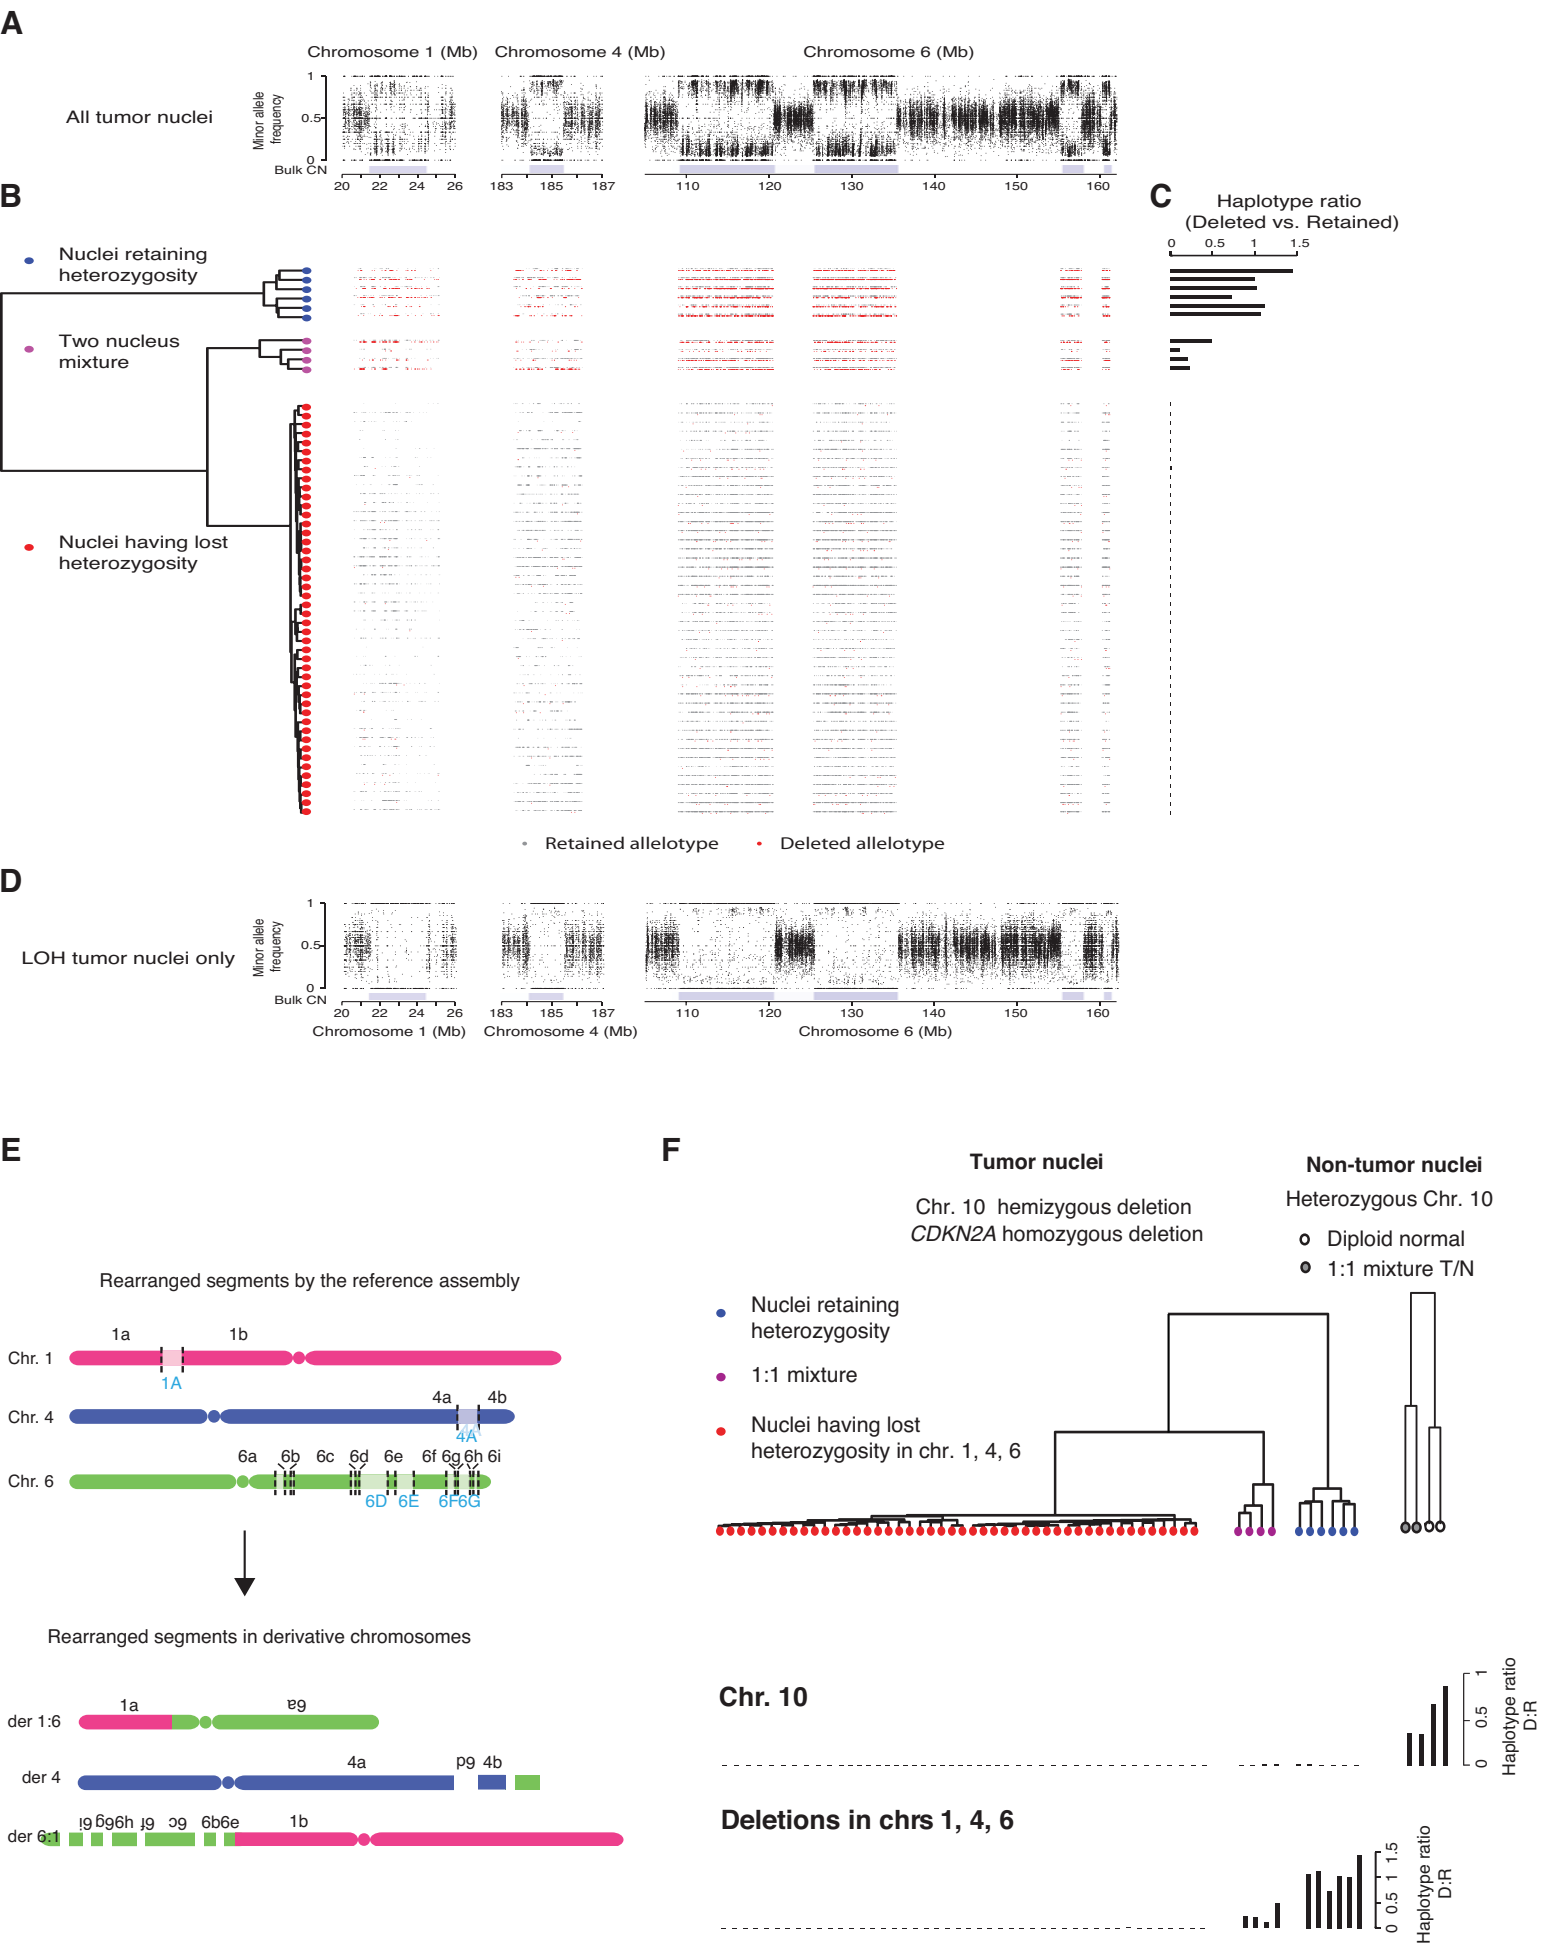

**A**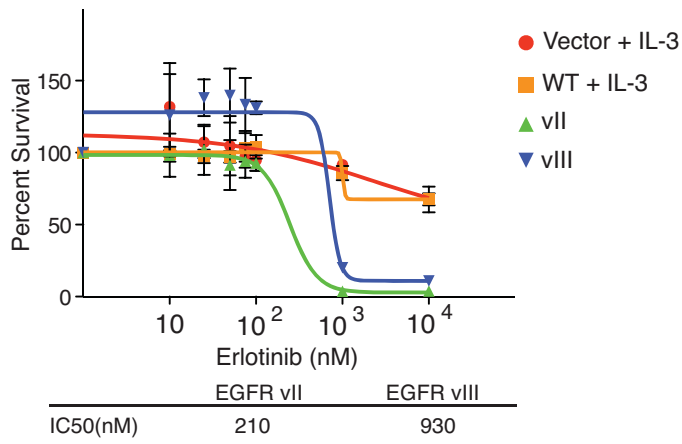**B**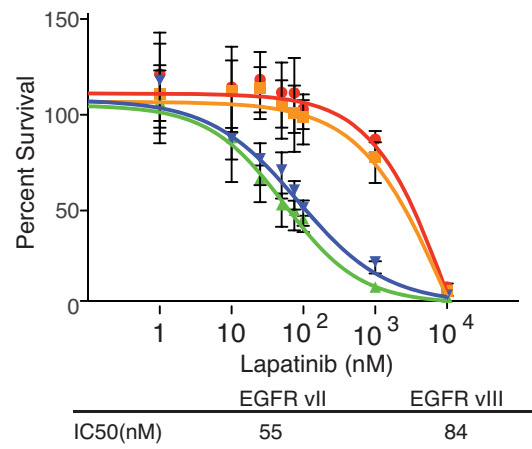**C**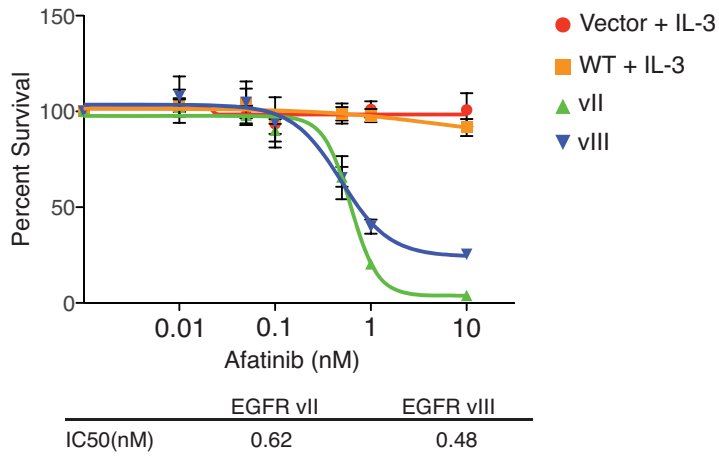**D**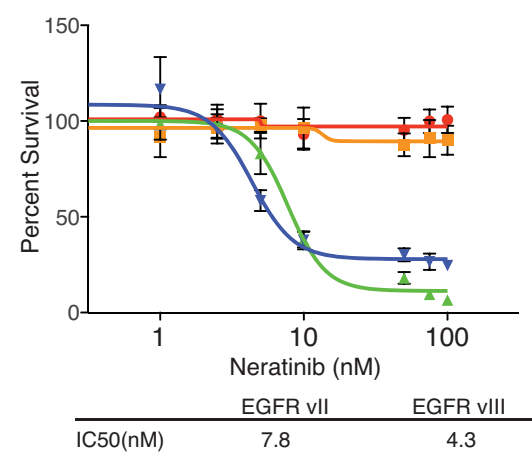

Supplement: NIHMS600550-supplement-3.pdf [file NIHMS600550-supplement-3.pdf]
